# Supplementary material for: Proton triggered emission and selective sensing of 2,4,6-trinitrophenol using a fluorescent hydrosol of 2-phenylquinoline
Source: Royal Society of Chemistry journal article supplement (doi:10.1039/c7nj03861e), 2017-12-26
Supplement: c7nj03861e1.pdf [file c7nj03861e1.pdf]

## Supporting Information

### Proton triggered emission and selective sensing of 2,4,6-trinitrophenol by fluorescent hydrosol of 2-phenylquinoline

Samir Maity, Milan Shyamal, Debasish Das, Ashim Maity, Sudipto Dey and Ajay Misra

Department of Chemistry and Chemical Technology, Vidyasagar University,

Midnapore 721 102, W.B, India.

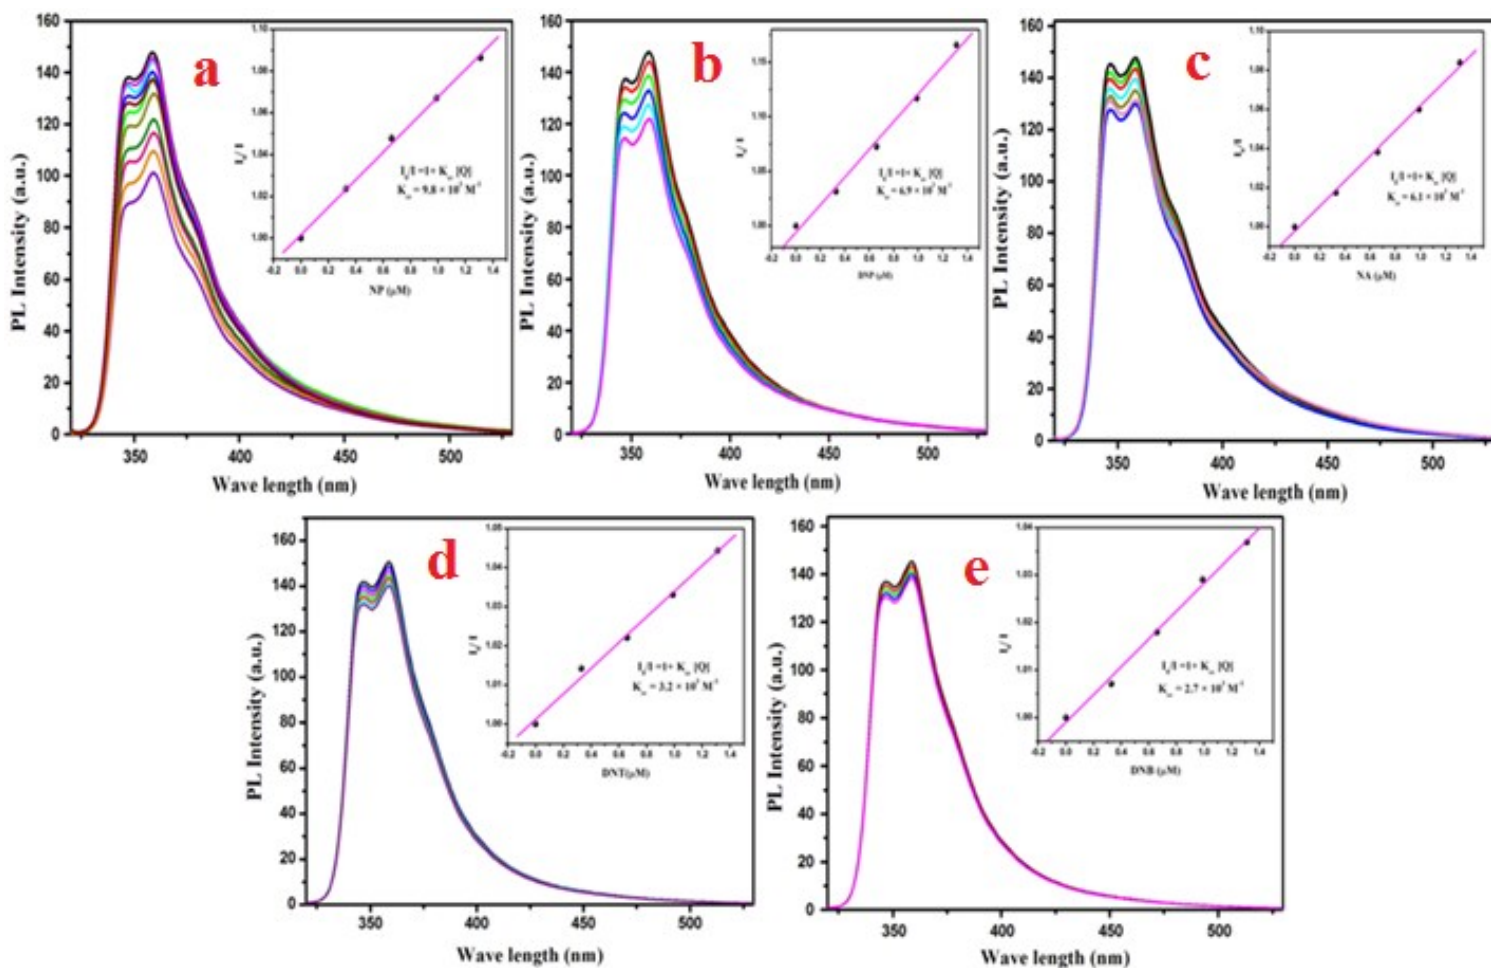

**Fig.S1** Fluorescence Quenching of PhQ hydrosol in presence of (a) 4-Nitro-phenol (NP), (b) 2,4-dinitro-phenol (DNP), (c) 4-Nitroaniline (NA), (d) Dinitro-toluene (DNT), (e) Dinitro-benzene (DNB).

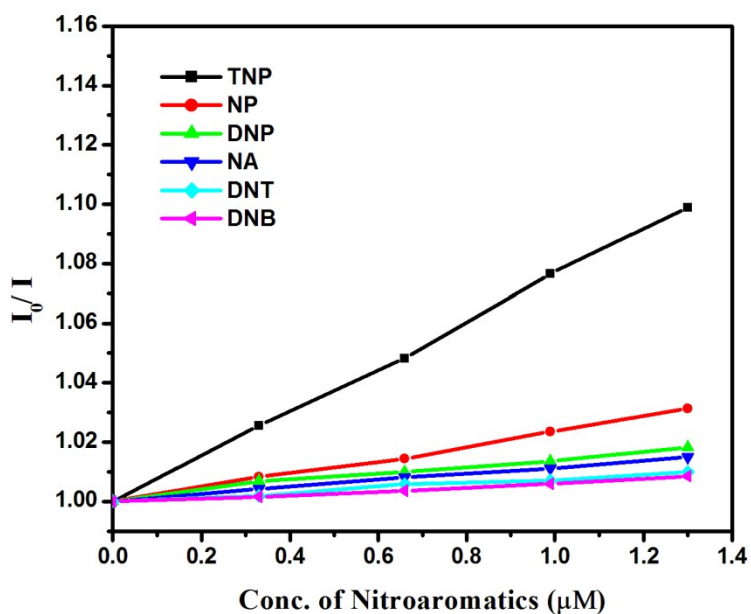

**Fig.S2** Comparison of Stern-Volmer plot of different nitroaromatics.

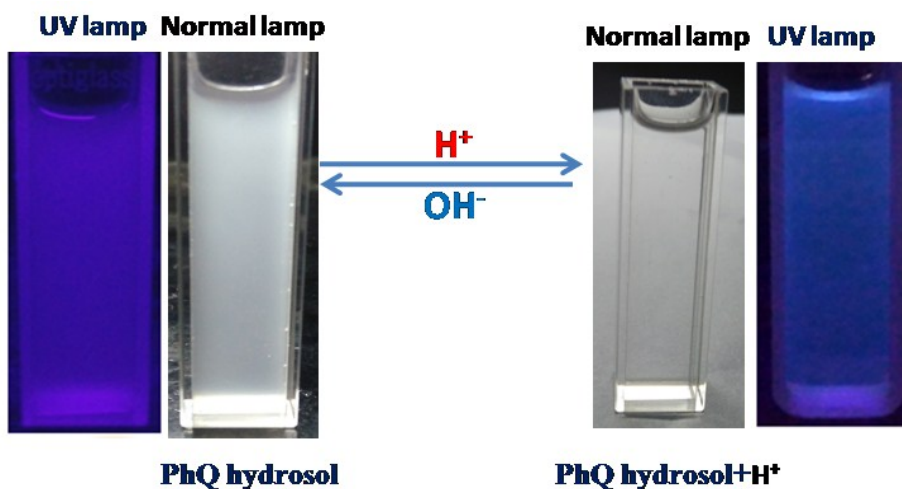

**Fig.S3:** Photographic picture of PhQ and protonated PhQ hydrosol under normal light and UV light (365 nm) irradiation.

**Table S1:** Stern-Volmer quenching constant ( $K_{SV} \text{ M}^{-1}$ ) for different nitroaromatics

| <b>Nitroaromatics</b> | <b>R</b>      | <b><math>K_{SV} (\text{M}^{-1})</math></b> |
|-----------------------|---------------|--------------------------------------------|
| <b>TNP</b>            | <b>0.9930</b> | <b><math>7.8 \times 10^4</math></b>        |
| <b>NP</b>             | <b>0.9981</b> | <b><math>9.8 \times 10^3</math></b>        |
| <b>DNP</b>            | <b>0.9995</b> | <b><math>6.9 \times 10^3</math></b>        |
| <b>NA</b>             | <b>0.9967</b> | <b><math>6.1 \times 10^3</math></b>        |
| <b>DNT</b>            | <b>0.9975</b> | <b><math>3.2 \times 10^3</math></b>        |
| <b>DNB</b>            | <b>0.9983</b> | <b><math>2.7 \times 10^3</math></b>        |

**Table S2:** A comparative study of our work with the other reported works in the literature with reference to  $K_{sv}$ , Detection limit and Anti interference study.

| <b>References</b>                                             | <b><math>K_{sv} (\text{M}^{-1})</math></b> | <b>Detection limit</b>                            | <b>Anti interference</b> |
|---------------------------------------------------------------|--------------------------------------------|---------------------------------------------------|--------------------------|
| <b>Anal. Methods, 2013,5,6228-6233</b>                        | <b>0.33</b>                                | <b>1 <math>\mu\text{M}</math></b>                 | <b>-</b>                 |
| <b>Dalton Trans. 2013,42,12403-12409</b>                      | <b>-</b>                                   | <b><math>4.5 \times 10^{-7} \text{ M}</math></b>  | <b>-</b>                 |
| <b>ACS Appl. Mater. Interfaces 2013, 5, 672–679</b>           | <b><math>1.55 \times 10^4</math></b>       | <b><math>3.5 \times 10^{-7} \text{ M}</math></b>  | <b>-</b>                 |
| <b>RSC Adv., 2016, 6, 37929-37932</b>                         | <b>-</b>                                   | <b><math>2.4 \times 10^{-7} \text{ M}</math></b>  | <b>-</b>                 |
| <b>J. Mol. Liq. 224, 2016, 255–264</b>                        | <b><math>6.02 \times 10^3</math></b>       | <b><math>2.98 \times 10^{-6} \text{ M}</math></b> | <b>-</b>                 |
| <b>J. Photo Chem. &amp; Photo Biology A. 2011,217,356-362</b> | <b><math>5.1 \times 10^4</math></b>        | <b><math>1 \times 10^{-8} \text{ M}</math></b>    | <b>-</b>                 |
| <b>Org. Lett. 2012,14,3112-3115</b>                           | <b><math>6.9 \times 10^4</math></b>        | <b>500 ppb</b>                                    | <b>-</b>                 |

|                                             |                              |                                 |            |
|---------------------------------------------|------------------------------|---------------------------------|------------|
| <b>J.Mater.Chem.A,2013,<br/>1,8745-8752</b> | <b>3.4 x 10<sup>4</sup></b>  | <b>8 x 10<sup>-8</sup> M</b>    | <b>-</b>   |
| <b>Chem.commun.,2013,<br/>49,4764</b>       | <b>-</b>                     | <b>70 nM</b>                    | <b>-</b>   |
| <b>J.Org. Chem., 2013,78,1306-<br/>1310</b> | <b>3.3 x 10<sup>4</sup></b>  | <b>354 ppb</b>                  | <b>-</b>   |
| <b>J. Mater. Chem.,<br/>2012,22,11574</b>   | <b>3.04 x 10<sup>4</sup></b> | <b>2.38 x 10<sup>-8</sup> M</b> | <b>-</b>   |
| <b>Our present study</b>                    | <b>7.8 x 10<sup>4</sup></b>  | <b>4.3 x 10<sup>-7</sup> M</b>  | <b>Yes</b> |
